# Supplementary material for: Podocyte injury in diabetic nephropathy: implications of angiotensin II – dependent activation of TRPC channels
Source: PubMed Central journal article supplement (PMC4674698; doi:10.1038/srep17637), 2015-12-10
Supplement: srep17637-s1.pdf [file srep17637-s1.pdf]

**SUPPLEMENTARY MATERIAL**

**Podocyte Injury in Diabetic Nephropathy: Implications of Angiotensin II – Dependent  
Activation of TRPC Channels**

Daria V. Ilatovskaya, Vladislav Levchenko, Andrea Lowing, Leonid S. Shuyskiy, Oleg Palygin,  
and Alexander Staruschenko

6 week long protocol

Supplementary Figure 1

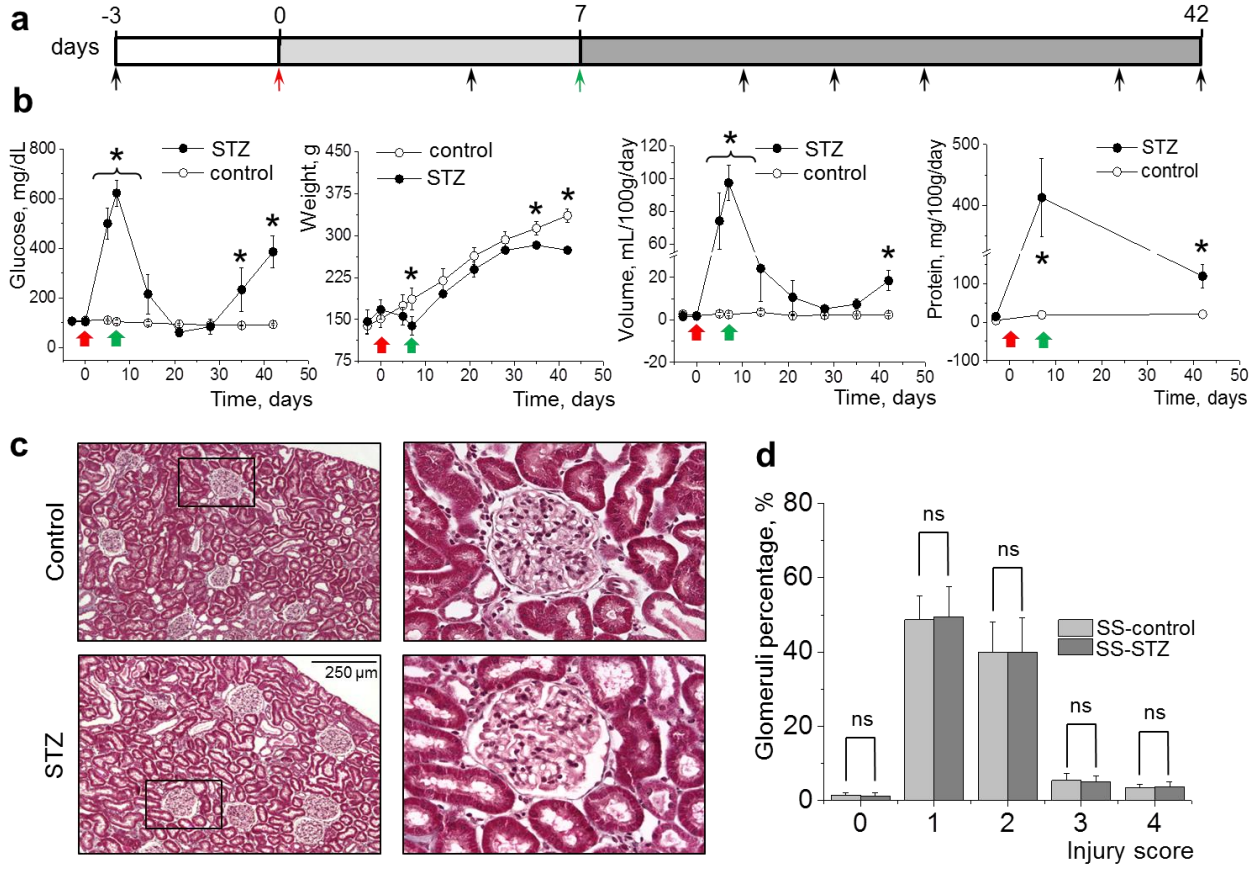

**Supplementary Figure 1.** (A) 6 week long protocol for diabetes induction. (B) Blood glucose, weight, urine output and protein content in control and STZ rats. (C) Histological characterization of the kidney. (D) Glomerular injury presented as a percentage of glomeruli for each score; 4 rats and 100 glomeruli per animal were evaluated per group.

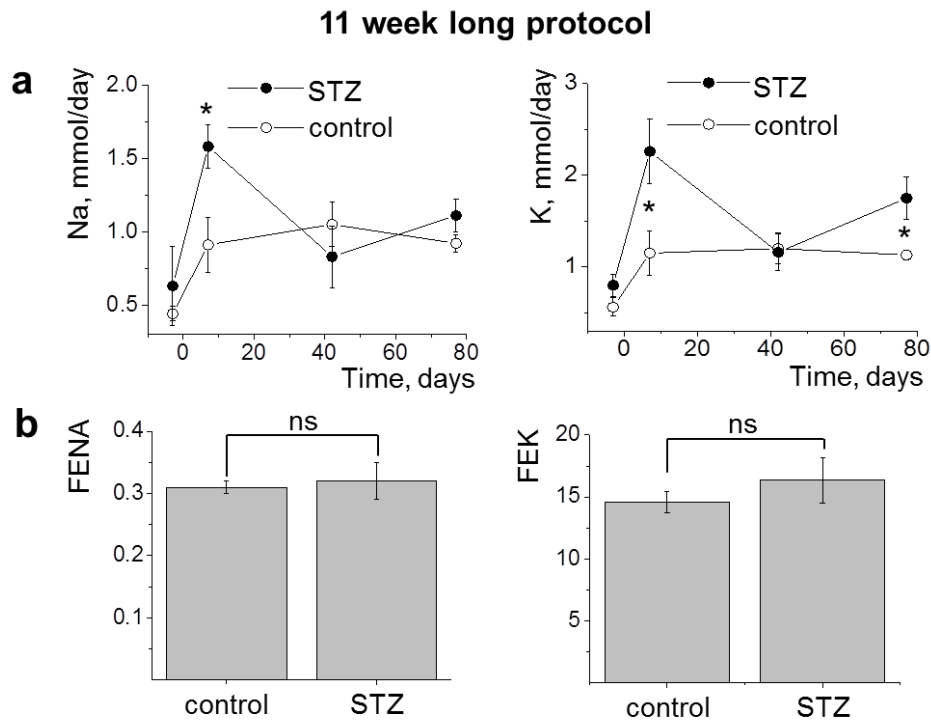

**Supplementary Figure 2.** (A) Urinary sodium and potassium excretion during the course of DN development, and fractional excretion values for sodium and potassium (B, terminal point, day 77). Asterisk denotes difference from the corresponding value in control rats ( $p < 0.05$ ), ns – not significant.
